# Supplementary material for: Characterization of a wheat–tetraploid Thinopyrum elongatum 1E(1D) substitution line K17–841-1 by cytological and phenotypic analysis and developed molecular markers
Source: BMC Genomics. 2019 Dec 10;20:963. doi: 10.1186/s12864-019-6359-9 (PMC6905003; doi:10.1186/s12864-019-6359-9)
Supplement: Supplementary file 3 — Additional file 3: Table S3. Stripe rust response at seedling stage and specific amplification of 1E chromosome markers in F2 population. [file 12864_2019_6359_MOESM3_ESM.docx]

**Table S3 Stripe rust response at seedling stage and specific amplification of 1E chromosome markers in F2 population**

| Lines | Infection type | Resistance/susceptibility | Specific amplicon |
| --- | --- | --- | --- |
| SY95-71 | 4 | S |  |
| SM482 | 4 | S | 0 |
| SM921 | 4 | S | 0 |
| SM969 | 4 | S | 0 |
| 8801 | 0; | R | 1 |
| K17-841-1 | 0 | R | 1 |
| F2-1 | 4 | S | 0 |
| F2-2 | 4 | S | 0 |
| F2-3 | 0 | R | 1 |
| F2-4 | 4 | S | 0 |
| F2-5 | 4 | S | 0 |
| F2-6 | 0 | R | 1 |
| F2-7 | 4 | S | 0 |
| F2-8 | 4 | S | 0 |
| F2-9 | 4 | S | 0 |
| F2-10 | 4 | S | 0 |
| F2-11 | 4 | S | 0 |
| F2-12 | 4 | S | 0 |
| F2-13 | 0 | R | 1 |
| F2-14 | 4 | S | 0 |
| F2-15 | 4 | S | 0 |
| F2-16 | 4 | S | 0 |
| F2-17 | 4 | S | 0 |
| F2-18 | 4 | S | 0 |
| F2-19 | 4 | S | 0 |
| F2-20 | 4 | S | 0 |
| F2-21 | 0 | R | 1 |
| F2-22 | 0 | R | 1 |
| F2-23 | 4 | S | 0 |
| F2-24 | 0 | R | 1 |
| F2-25 | 4 | S | 0 |
| F2-26 | 4 | S | 0 |
| F2-27 | 4 | S | 0 |
| F2-28 | 4 | S | 0 |
| F2-29 | 4 | S | 0 |
| F2-30 | 0 | R | 1 |
| F2-31 | 4 | S | 0 |
| F2-32 | 0 | R | 1 |
| F2-33 | 4 | S | 0 |
| F2-34 | 4 | S | 0 |
| F2-35 | 4 | S | 0 |
| F2-36 | 0 | R | 1 |
| F2-37 | 0 | R | 1 |
| F2-38 | 4 | S | 0 |
| F2-39 | 4 | S | 0 |
| F2-40 | 4 | S | 0 |
| F2-41 | 4 | S | 0 |
| F2-42 | 0 | R | 1 |
| F2-43 | 4 | S | 0 |
| F2-44 | 4 | S | 0 |
| F2-45 | 4 | S | 0 |
| F2-46 | 4 | S | 0 |
| F2-47 | 0 | R | 1 |
| F2-48 | 0 | R | 1 |
| F2-49 | 4 | S | 0 |
| F2-50 | 4 | S | 0 |
| F2-51 | 4 | S | 0 |
| F2-52 | 4 | S | 0 |
| F2-53 | 4 | S | 0 |
| F2-54 | 4 | S | 0 |
| F2-55 | 0 | R | 1 |
| F2-56 | 0 | R | 1 |
| F2-57 | 4 | S | 0 |
| F2-58 | 4 | S | 0 |
| F2-59 | 4 | S | 0 |
| F2-60 | 4 | S | 0 |
| F2-61 | 0 | R | 1 |
| F2-62 | 4 | S | 0 |
| F2-63 | 4 | S | 0 |
| F2-64 | 0 | R | 1 |
| F2-65 | 4 | S | 0 |
| F2-66 | 4 | S | 0 |
| F2-67 | 0 | R | 1 |
| F2-68 | 4 | S | 0 |
| F2-69 | 4 | S | 0 |
| F2-70 | 4 | S | 0 |
| F2-71 | 4 | S | 0 |
| F2-72 | 4 | S | 0 |
| F2-73 | 0 | R | 1 |
| F2-74 | 4 | S | 0 |
| F2-75 | 0 | R | 1 |
| F2-76 | 4 | S | 0 |
| F2-77 | 4 | S | 0 |
| F2-78 | 4 | S | 0 |
| F2-79 | 4 | S | 0 |
| F2-80 | 4 | S | 0 |

Note: “1” or “0” indicates the presence or absence of the specific band, respectively.
